# Supplementary material for: Sucking lice in bandicoot rats with first complete description of Hoplopleura malabarica nymphs
Source: PeerJ. 2025 Oct 7;13:e20115. doi: 10.7717/peerj.20115 (PMC12513375; doi:10.7717/peerj.20115)
Supplement: Supplemental Information 1 [file peerj-13-20115-s001.xlsx]

## Sheet: Arkusz1
														nymphs first instar n=2			nymphs second instar n=2			nymphs third instar n=4
		1N1	2N1	1N2	2N2	1N3	2N3	3N3	4N3				average	max	min	average	max	min	average	max	min
length	head	0.18	0.21	0.15	0.16	0.15	0.16	0.16	0.18		length	head	0.195	0.21	0.18	0.155	0.16	0.15	0.1625	0.18	0.15
	thorax	0.11	0.14	0.16	0.17	0.14	0.16	0.16	0.12			thorax	0.125	0.14	0.11	0.165	0.17	0.16	0.145	0.16	0.12
	abdomen	0.51	0.6	0.55	0.42	0.69	0.74	0.72	0.69			abdomen	0.555	0.6	0.51	0.485	0.55	0.42	0.71	0.74	0.69
	total	0.8	0.95	0.86	0.75	0.98	1.06	1.04	0.99			total	0.875	0.95	0.8	0.805	0.86	0.75	1.0175	1.06	0.98
width	head	0.15	0.18	0.17	0.14	0.17	0.16	0.17	0.15		width	head	0.165	0.18	0.15	0.155	0.17	0.14	0.1625	0.17	0.15
	thorax	0.3	0.31	0.29	0.26	0.32	0.36	0.34	0.27			thorax	0.305	0.31	0.3	0.275	0.29	0.26	0.3225	0.36	0.27
	abdomen	0.48	0.52	0.48	0.36	0.61	0.76	0.72	0.56			abdomen	0.5	0.52	0.48	0.42	0.48	0.36	0.6625	0.76	0.56
